# Supplementary material for: Virus Incidence of Sweet Potato in Korea from 2011 to 2014
Source: PubMed Central journal article supplement — Plant Pathol J. 2017 Oct 1;33(5):467–77. doi: 10.5423/PPJ.OA.08.2016.0167 (PMC5624489; doi:10.5423/ppj.oa.08.2016.0167), 2017-10-01
Supplement: ppj-33-467_suppl.pdf [file ppj-33-467_suppl.pdf]

**Supplementary Table 1.** List of used primers for virus detection RT-PCR

| Virus                                | Primer <sup>a</sup> | Sequence (5'→3')          | Loci        | Size (nt) |
|--------------------------------------|---------------------|---------------------------|-------------|-----------|
| <u>Multiplex RT-PCR primer set 1</u> |                     |                           |             |           |
| SPLCV                                | SPLC-u1             | TCTGCCGTCGATCTGGAATC      | 2315–2335   | 507       |
|                                      | SPLC-d1             | GTGCCCGCCTTTGGTGGAC       | 2821–2803   |           |
| SPFMV                                | SPFMV 1-F           | TACACACTGCTAAAACTAGG      | 9073–9092   | 356       |
|                                      | SPFMV 1-R           | AGTTCATCATAACCCCATGA      | 9428–9409   |           |
| SPVG                                 | SPG 3-F             | CAATGCCAAATGGAAGAATAG     | 9945–9965   | 286       |
|                                      | SPG 3-R             | GCATGATCCAATAGAGGTTTTA    | 10230–10209 |           |
| SPLV                                 | SPLV 1-F            | GGAGTCAGTTCAATCAATGGTA    | 9340–9361   | 184       |
|                                      | SPLV 1-R            | AGTGGCTTTATTGGGTATGAT'    | 9523–9503   |           |
| <u>Multiplex RT-PCR primer set 2</u> |                     |                           |             |           |
| SPCFV                                | SPCFV 2F            | AGCTGCTCAAACAAGCAAGAGG    | 8526–8547   | 579       |
|                                      | SPCFV 2R            | GCTCAAAGTACTTTAAAACATGC   | 9104–9081   |           |
| SPVC                                 | SPVC-F              | ATTCTTGAATGGGATAGATCACATG | 9353–9377   | 447       |
|                                      | SPVC-R              | AGCTTCACGAAGCGCAGC        | 9799–9782   |           |
| SPV2                                 | SPV2-F1             | ATGTGTTGAACCATCAGCTGAA    | 9414–9435   | 369       |
|                                      | SPV2-R1             | GTAACCTGCCTTGGGCTACG      | 9782–9763   |           |
| SPSMV-1                              | SPSMV-1 F1          | ACCGTGTATTTGATGACGATGTAC  | 352–375     | 230       |
|                                      | SPSMV-1 R           | GGGAAGTTCTGGTAGAACGTATC   | 581–559     |           |

**Supplementary Table 2.** Virus infection status of cultivars from Yeosu-si Agricultural Technical Center

|    | Cultivars                 | No. Samples<br>(Detected/Tested) | Virus |       |      |      |
|----|---------------------------|----------------------------------|-------|-------|------|------|
|    |                           |                                  | SPLCV | SPFMV | SPGV | SPLV |
| AA | Yeojubam                  | 4/5                              | 2     | 2     | 4    | 2    |
| AB | 70il                      | 2/4                              | 2     | 1     | 0    | 0    |
| AC | Geon-mi                   | 4/10                             | 3     | 4     | 2    | 0    |
| AD | Geonphung-mi              | 9/9                              | 8     | 9     | 6    | 1    |
| AE | Gogeon-mi                 | 7/10                             | 2     | 4     | 7    | 0    |
| AF | Gongyu-mi                 | 0/10                             | 0     | 0     | 0    | 0    |
| AG | Geum-si                   | 1/1                              | 1     | 1     | 0    | 1    |
| AH | Gintoki                   | 6/7                              | 6     | 3     | 0    | 0    |
| AI | Daeyu-mi                  | 8/8                              | 8     | 6     | 5    | 0    |
| AJ | Matna-mi                  | 7/10                             | 7     | 4     | 6    | 0    |
| AK | Myeongsoon-mi             | 1/8                              | 1     | 1     | 0    | 0    |
| AL | Backgoguma                | 3/5                              | 3     | 2     | 2    | 1    |
| AM | Benisatsuma               | 3/3                              | 3     | 1     | 0    | 0    |
| AN | Vietnam no. 1             | 3/4                              | 3     | 3     | 0    | 0    |
| AO | Vietnam no. 2             | 10/10                            | 10    | 7     | 5    | 2    |
| AP | Vietnam no. 3             | 3/6                              | 1     | 3     | 0    | 0    |
| AQ | Bora-mi                   | 2/10                             | 2     | 2     | 1    | 0    |
| AR | Samhui-mi                 | 3/5                              | 3     | 2     | 2    | 0    |
| AS | Sangja-mi                 | 8/10                             | 0     | 2     | 8    | 0    |
| AT | Saeng-mi                  | 6/10                             | 4     | 6     | 5    | 0    |
| AU | Singeon-mi                | 5/8                              | 4     | 5     | 0    | 0    |
| AV | Sinyeaju                  | 1/10                             | 0     | 1     | 0    | 0    |
| AW | Sinyul-mi                 | 0/9                              | 0     | 0     | 0    | 0    |
| AX | Sinja-mi                  | 2/10                             | 0     | 2     | 0    | 0    |
| AY | New cultivar - Jsaek      | 7/16                             | 0     | 6     | 6    | 0    |
| AZ | New cultivar - Hobak      | 0/10                             | 0     | 0     | 0    | 0    |
| BA | Sinhwang-mi               | 6/16                             | 4     | 6     | 0    | 0    |
| BB | Yanghobak                 | 7/8                              | 5     | 7     | 0    | 0    |
| BC | Yeoja-mi                  | 7/8                              | 6     | 7     | 3    | 2    |
| BD | Yeosu no. 10              | 8/10                             | 2     | 8     | 7    | 0    |
| BE | Yeosu no. 11 – Borasaek   | 7/10                             | 6     | 7     | 1    | 2    |
| BF | Yeosu no. 12              | 4/10                             | 1     | 4     | 2    | 1    |
| BG | Yeosu no. 13              | 2/5                              | 0     | 2     | 0    | 0    |
| BH | Yeosu no. 14              | 7/9                              | 7     | 5     | 0    | 2    |
| BI | Yeosu no. 15              | 5/5                              | 5     | 2     | 1    | 0    |
| BJ | Yeosu no. 16              | 10/10                            | 10    | 7     | 4    | 0    |
| BK | Yeosu no. 17              | 9/10                             | 9     | 7     | 4    | 0    |
| BL | Yeosu no. 1 - Cheongsaeak | 4/10                             | 1     | 4     | 2    | 0    |
| BM | Yeosu no. 4               | 3/8                              | 0     | 3     | 2    | 1    |
| BN | Yeosu no. 5               | 2/10                             | 1     | 1     | 2    | 0    |
| BO | Yeosu no. 6               | 1/10                             | 0     | 1     | 1    | 0    |
| BP | Yeosu no. 7               | 1/10                             | 0     | 1     | 0    | 0    |

|    |                      |       |    |   |   |   |
|----|----------------------|-------|----|---|---|---|
| BQ | Yeosu no. 8          | 7/8   | 7  | 2 | 0 | 0 |
| BR | Yeosu no. 9          | 10/10 | 10 | 5 | 3 | 1 |
| BS | Yeojung-mi           | 10/10 | 10 | 4 | 3 | 0 |
| BT | Yeon-mi              | 7/8   | 6  | 7 | 0 | 0 |
| BU | Yeonja-mi            | 7/10  | 0  | 3 | 7 | 0 |
| BV | Yeonhwang-mi         | 7/10  | 3  | 7 | 3 | 0 |
| BW | Oja-mi               | 3/9   | 2  | 3 | 3 | 0 |
| BX | Ja-mi                | 2/7   | 0  | 1 | 2 | 0 |
| BY | Korean wild cultivar | 8/8   | 2  | 6 | 8 | 0 |
| BZ | Jengae-mi            | 1/10  | 1  | 0 | 1 | 0 |
| CA | Jonghobak            | 3/3   | 3  | 1 | 0 | 0 |
| CB | Juhwang-mi           | 0/4   | 0  | 0 | 0 | 0 |
| CC | Jeung-mi             | 2/3   | 1  | 1 | 2 | 0 |
| CD | Jinhong-mi           | 5/10  | 3  | 5 | 1 | 0 |
| CE | Palgeum-si           | 6/10  | 6  | 3 | 0 | 0 |
| CF | Palpal               | 2/10  | 2  | 2 | 1 | 0 |
| CG | Happy-mi             | 3/10  | 3  | 0 | 0 | 0 |
| CH | Healthy-mi           | 7/10  | 7  | 1 | 0 | 0 |
| CI | Hyeonghaetan         | 8/9   | 0  | 8 | 0 | 3 |
| CJ | Hobak                | 5/7   | 5  | 4 | 4 | 1 |
| CK | Hwanggeum            | 4/5   | 4  | 2 | 3 | 0 |
| CL | Huija-mi             | 3/9   | 1  | 4 | 3 | 0 |

**Supplementary Table 3.** Mixed infection type of eight sweet potato viruses from sweet potato growing fields of Korea in 2013

| Mixed infection status | Detected Virus |      |      |      |      |       |       |         | Sub-total | Total (%)  |
|------------------------|----------------|------|------|------|------|-------|-------|---------|-----------|------------|
|                        | SPFMV          | SPVC | SPVG | SPV2 | SPLV | SPCFV | SPLCV | SPSMV-1 |           |            |
| Septuple               | 0              | 0    | 0    | 0    | 0    |       | 0     | 0       | 1         | 1 (0.11)   |
| Sextuple               | 0              | 0    | 0    |      | 0    |       | 0     | 0       | 1         | 1 (0.11)   |
| Quintuple              | 0              | 0    | 0    | 0    | 0    |       |       |         | 1         | 17 (2.09)  |
|                        | 0              | 0    | 0    | 0    |      |       |       | 0       | 2         |            |
|                        | 0              | 0    | 0    | 0    |      |       | 0     |         | 4         |            |
|                        | 0              | 0    |      | 0    | 0    |       |       | 0       | 1         |            |
|                        | 0              | 0    |      | 0    |      |       | 0     | 0       | 3         |            |
|                        | 0              | 0    |      |      | 0    |       | 0     | 0       | 3         |            |
|                        | 0              |      | 0    | 0    | 0    |       | 0     |         | 2         |            |
|                        |                | 0    | 0    | 0    |      |       | 0     | 0       | 1         |            |
| Quadruple              | 0              | 0    | 0    | 0    |      |       |       |         | 1         | 55 (6.77)  |
|                        | 0              | 0    | 0    |      |      |       | 0     |         | 2         |            |
|                        | 0              | 0    |      | 0    |      |       | 0     |         | 5         |            |
|                        | 0              | 0    |      | 0    | 0    |       |       |         | 1         |            |
|                        | 0              | 0    |      | 0    |      |       |       | 0       | 1         |            |
|                        | 0              | 0    |      |      | 0    |       |       | 0       | 1         |            |
|                        | 0              | 0    |      |      |      |       | 0     | 0       | 12        |            |
|                        | 0              |      | 0    | 0    | 0    |       |       |         | 1         |            |
|                        | 0              |      | 0    |      | 0    |       | 0     |         | 7         |            |
|                        | 0              |      | 0    |      | 0    |       |       | 0       | 2         |            |
|                        | 0              |      | 0    |      |      |       | 0     | 0       | 2         |            |
|                        | 0              |      | 0    | 0    |      |       | 0     |         | 5         |            |
|                        | 0              |      |      | 0    | 0    |       | 0     |         | 1         |            |
|                        | 0              |      |      | 0    | 0    |       | 0     | 0       | 2         |            |
|                        | 0              |      |      |      | 0    |       | 0     | 0       | 2         |            |
|                        |                | 0    |      | 0    | 0    |       | 0     |         | 1         |            |
|                        | 0              |      | 0    | 0    |      | 0     | 0     | 1       |           |            |
|                        | 0              |      | 0    | 0    |      | 0     |       | 1       |           |            |
|                        | 0              |      | 0    | 0    | 0    |       |       | 2       |           |            |
|                        |                | 0    | 0    |      |      | 0     | 0     | 1       |           |            |
|                        |                | 0    |      | 0    |      | 0     | 0     | 1       |           |            |
|                        |                |      | 0    | 0    |      | 0     | 0     | 3       |           |            |
| Triple                 | 0              | 0    | 0    |      |      |       |       |         | 1         | 83 (10.21) |
|                        | 0              | 0    |      | 0    |      |       |       |         | 1         |            |
|                        | 0              | 0    |      |      |      |       | 0     |         | 5         |            |
|                        | 0              | 0    |      |      |      |       |       | 0       | 3         |            |
|                        | 0              |      | 0    | 0    |      |       |       |         | 4         |            |
|                        | 0              |      | 0    |      | 0    |       |       |         | 3         |            |
|                        | 0              |      | 0    |      |      |       | 0     |         | 5         |            |
|                        | 0              |      | 0    |      |      |       |       | 0       | 5         |            |
|                        | 0              |      |      | 0    |      |       | 0     |         | 4         |            |
|                        | 0              |      |      |      | 0    |       |       | 0       | 2         |            |

|                     |   |   |   |   |   |   |    |     |             |
|---------------------|---|---|---|---|---|---|----|-----|-------------|
| <b>Triple</b>       | O |   |   |   |   | O | O  | 11  | 83 (10.21)  |
|                     |   | O |   |   | O | O |    | 1   |             |
|                     |   | O |   |   | O |   | O  | 3   |             |
|                     |   | O |   |   |   |   | O  | 9   |             |
|                     |   |   | O |   | O |   | O  | 1   |             |
|                     |   |   | O |   | O |   | O  | 3   |             |
|                     |   |   | O |   |   | O |    | 3   |             |
|                     |   |   | O |   |   |   | O  | 2   |             |
|                     |   |   |   | O |   | O |    | 4   |             |
|                     |   |   |   | O |   | O |    | 2   |             |
|                     |   |   |   | O |   | O |    | 5   |             |
|                     |   |   |   | O |   | O | 6  |     |             |
| <b>Double</b>       | O | O |   |   |   |   |    | 1   | 228 (28.04) |
|                     | O |   | O |   |   |   |    | 6   |             |
|                     | O |   |   | O |   |   |    | 1   |             |
|                     | O |   |   |   | O |   |    | 3   |             |
|                     | O |   |   |   |   | O |    | 18  |             |
|                     | O |   |   |   |   |   | O  | 18  |             |
|                     |   | O |   | O |   |   |    | 1   |             |
|                     |   | O |   |   |   |   | O  | 4   |             |
|                     |   | O |   |   |   |   | O  | 10  |             |
|                     |   |   | O |   | O |   |    | 6   |             |
|                     |   |   | O |   |   | O |    | 1   |             |
|                     |   |   | O |   |   |   | O  | 7   |             |
|                     |   |   | O |   |   |   | O  | 11  |             |
|                     |   |   |   | O |   | O |    | 2   |             |
|                     |   |   |   | O |   |   | O  | 17  |             |
|                     |   |   | O |   |   | O | 14 |     |             |
|                     |   |   |   | O |   | O | 42 |     |             |
|                     |   |   |   |   | O | O | 2  |     |             |
|                     |   |   |   |   | O | O | 64 |     |             |
| <b>Single</b>       | O |   |   |   |   |   |    | 14  | 284 (34.93) |
|                     |   | O |   |   |   |   |    | 4   |             |
|                     |   |   | O |   |   |   |    | 10  |             |
|                     |   |   |   | O |   |   |    | 10  |             |
|                     |   |   |   |   | O |   |    | 4   |             |
| <b>No detection</b> |   |   |   |   |   | O |    | 42  | 146 (17.96) |
|                     |   |   |   |   |   |   | O  | 200 |             |
| <b>Total</b>        |   |   |   |   |   |   |    | 146 | 813         |

**Supplementary Table 4.** Mixed infection type of eight sweet potato viruses from sweet potato growing fields of Korea in 2014

| Mixed Infection status | Detected virus |      |      |      |      |       |       |         | Sub-total | Total (%) |
|------------------------|----------------|------|------|------|------|-------|-------|---------|-----------|-----------|
|                        | SPFMV          | SPVC | SPVG | SPV2 | SPLV | SPCFV | SPLCV | SPSMV-1 |           |           |
| Septuple               | ○              | ○    | ○    | ○    | ○    | ○     | ○     |         | 2         | 3(0.24)   |
|                        | ○              | ○    | ○    | ○    |      | ○     | ○     | ○       | 1         |           |
| Sextuple               | ○              | ○    | ○    | ○    | ○    |       | ○     |         | 5         | 16(1.30)  |
|                        | ○              | ○    | ○    | ○    | ○    |       |       | ○       | 3         |           |
|                        | ○              | ○    | ○    | ○    |      | ○     | ○     |         | 3         |           |
|                        | ○              | ○    | ○    | ○    |      |       | ○     | ○       | 2         |           |
|                        | ○              | ○    |      | ○    | ○    |       | ○     | ○       | 1         |           |
|                        | ○              | ○    |      |      | ○    | ○     | ○     | ○       | 1         |           |
|                        | ○              |      | ○    | ○    | ○    |       | ○     | ○       | 1         |           |
| Quintuple              | ○              | ○    | ○    | ○    | ○    |       |       |         | 8         | 51(4.15)  |
|                        | ○              | ○    | ○    | ○    |      | ○     |       |         | 1         |           |
|                        | ○              | ○    | ○    | ○    |      |       | ○     |         | 10        |           |
|                        | ○              | ○    | ○    | ○    |      |       |       | ○       | 4         |           |
|                        | ○              | ○    | ○    |      | ○    |       |       | ○       | 2         |           |
|                        | ○              | ○    | ○    |      |      |       | ○     | ○       | 2         |           |
|                        | ○              | ○    |      | ○    | ○    |       | ○     |         | 3         |           |
|                        | ○              | ○    |      | ○    | ○    |       |       | ○       | 1         |           |
|                        | ○              | ○    |      | ○    |      |       | ○     | ○       | 4         |           |
|                        | ○              | ○    |      |      | ○    |       | ○     | ○       | 2         |           |
|                        | ○              |      | ○    | ○    | ○    | ○     |       | ○       | 1         |           |
|                        | ○              |      | ○    | ○    | ○    |       | ○     | ○       | 3         |           |
|                        | ○              |      | ○    | ○    | ○    | ○     | ○     |         | 3         |           |
|                        | ○              |      | ○    |      | ○    |       | ○     | ○       | 1         |           |
|                        | ○              |      |      | ○    | ○    | ○     | ○     | ○       | 1         |           |
|                        | ○              |      |      | ○    | ○    |       | ○     | ○       | 2         |           |
| Quadruple              | ○              | ○    | ○    | ○    |      |       |       |         | 9         | 120(9.77) |
|                        | ○              | ○    | ○    |      |      |       | ○     |         | 2         |           |
|                        | ○              | ○    | ○    |      |      |       |       | ○       | 6         |           |
|                        | ○              | ○    |      | ○    | ○    |       |       |         | 4         |           |
|                        | ○              | ○    |      | ○    |      |       | ○     |         | 8         |           |
|                        | ○              | ○    |      | ○    |      | ○     |       |         | 1         |           |
|                        | ○              | ○    |      | ○    |      |       |       | ○       | 8         |           |
|                        | ○              | ○    |      |      | ○    | ○     |       |         | 1         |           |
|                        | ○              | ○    |      |      | ○    |       | ○     |         | 3         |           |
|                        | ○              | ○    |      |      | ○    |       |       | ○       | 4         |           |
